# Supplementary material for: Hydrothermal synthesis of dittmarite-group NH4(Co1−xMnx)PO4·H2O particles as inorganic violet pigments
Source: Royal Society of Chemistry journal article supplement (doi:10.1039/d3ra07387d), 2024-01-01
Supplement: d3ra07387d1.pdf [file d3ra07387d1.pdf]

## Supplementary information

# Hydrothermal synthesis of dittmarite-group $\text{NH}_4(\text{Co}_{1-x}\text{Mn}_x)\text{PO}_4 \cdot \text{H}_2\text{O}$ particles as inorganic □ violet pigments

Hiroaki Uchiyama\* and Saori Tachibana

### Corresponding Author

Hiroaki Uchiyama, Department of Chemistry and Materials Engineering, Kansai University, 3-3-35 Yamate-cho, Suita, 564-8680, Japan. E-mail: [h\\_uchi@kansai-u.ac.jp](mailto:h_uchi@kansai-u.ac.jp) (H. Uchiyama)

### Authors

Saori Tachibana, Department of Chemistry and Materials Engineering, Kansai University, 3-3-35 Yamate-cho, Suita, 564-8680, Japan

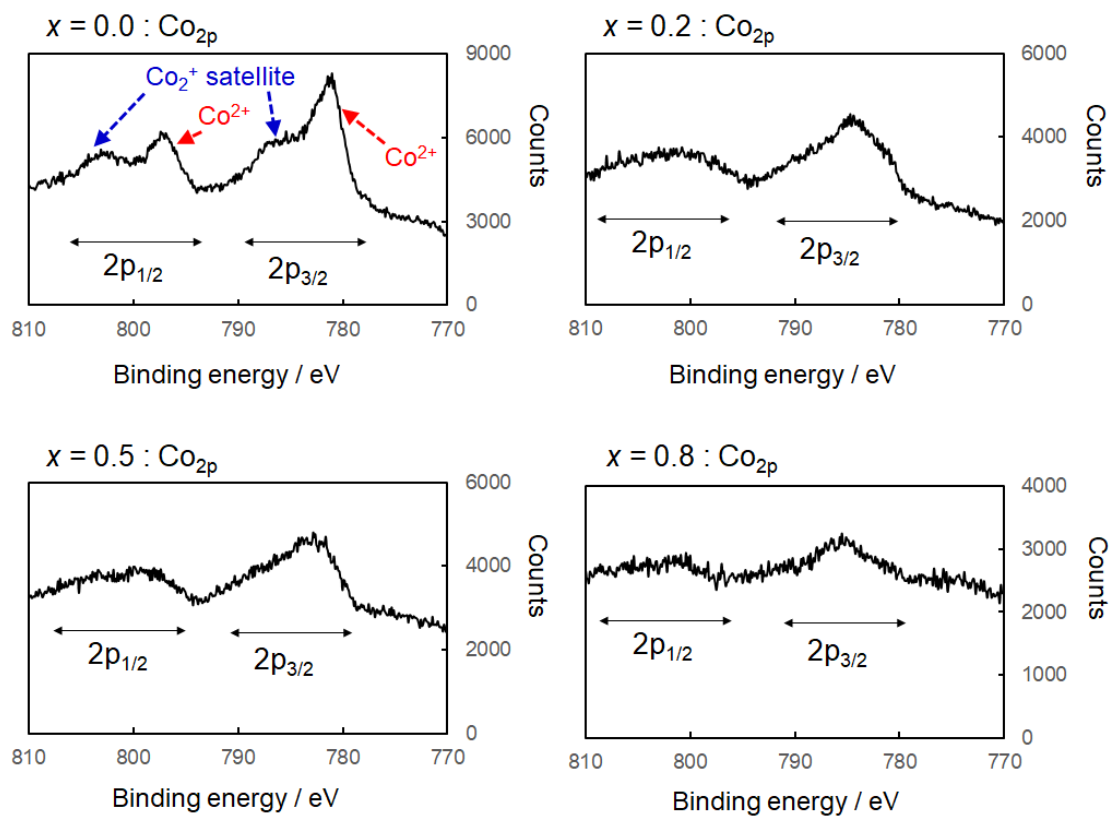

**Fig. S1** XPS spectra ( $\text{Co}_{2p}$ ) of the  $\text{NH}_4(\text{Co}_{1-x}\text{Mn}_x)\text{PO}_4 \cdot \text{H}_2\text{O}$  samples with  $x = 0-0.8$ .

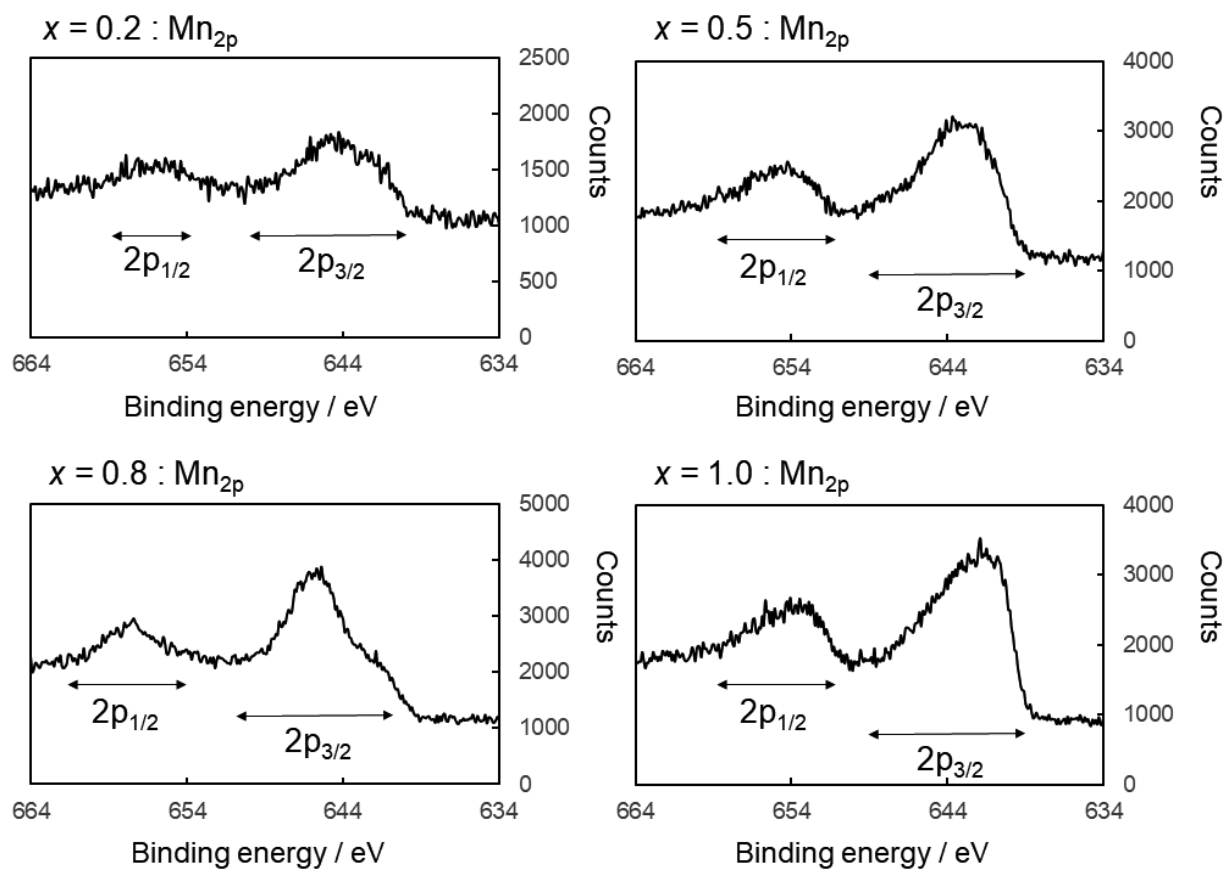

**Fig. S2** XPS spectra (Mn<sub>2p</sub>) of the NH<sub>4</sub>(Co<sub>1-x</sub>Mn<sub>x</sub>)PO<sub>4</sub>·H<sub>2</sub>O samples with  $x = 0.2-1.0$ .

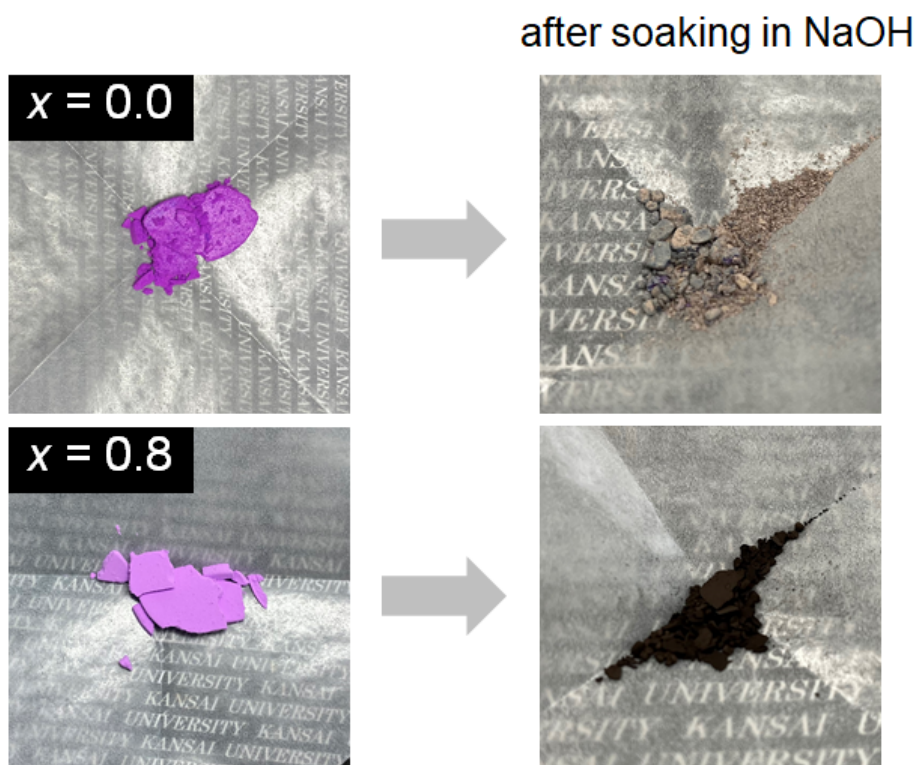

**Fig. S3** Appearances of  $\text{NH}_4(\text{Co}_{1-x}\text{Mn}_x)\text{PO}_4 \cdot \text{H}_2\text{O}$  samples with  $x = 0$  and  $0.8$  before and after soaking in NaOH solutions.
